# Supplementary figures and images for: Developing a Short Assessment of Environmental Health Literacy (SA-EHL)
Source: MDPI journal article supplement (doi:10.3390/ijerph19042062), 2022-02-12

A.

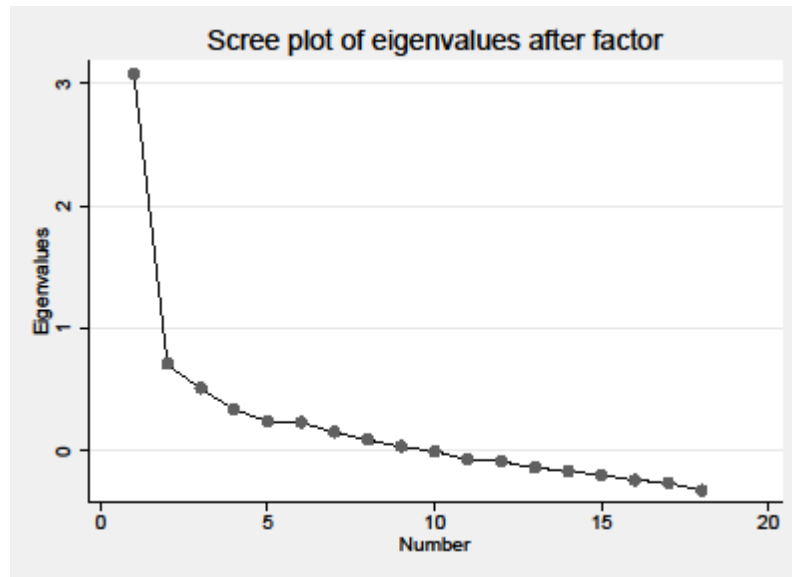

B.

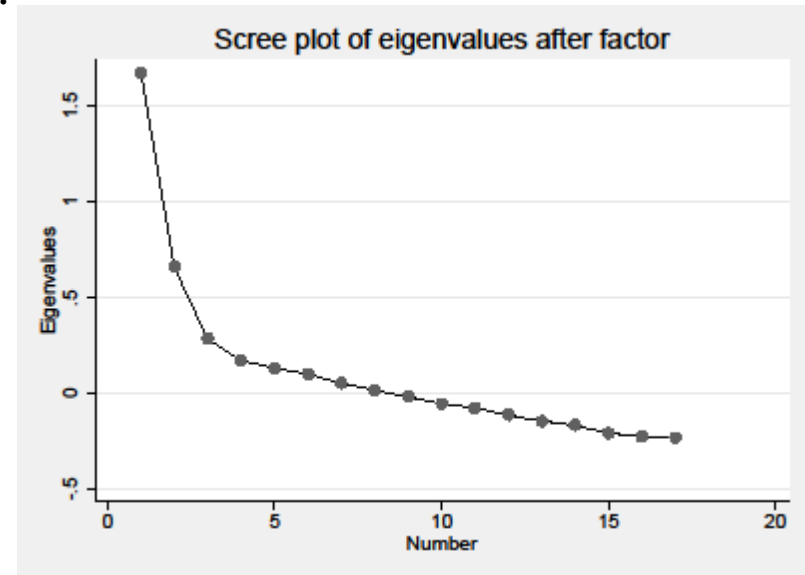

Supplemental Figure S1. Scree plot for the SAHL (A) and the SA-EHL (B).

Supplement: s1 [file s1]
